# Supplementary material
Source: Springer Nature journal article supplement (https://www.springermedizin.de/resource/supplementary/12889_2013_6804_MOESM2_ESM.pdf/9499068)
Supplement: MOESM2 [file 9499068]

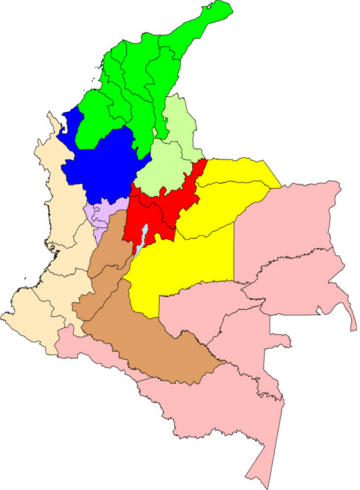

| Region                          | Sample size  | Immunization schedule |              | Margin of error |
|---------------------------------|--------------|-----------------------|--------------|-----------------|
|                                 |              | Complete              | Incomplete   | %               |
| Bogotá                          | 100          | 31                    | 69           | 8.0             |
| Antiguos Territorios Nacionales | 200          | 58                    | 142          | 5.7             |
| Antioquia                       | 735          | 221                   | 514          | 2.6             |
| Atlántica                       | 800          | 276                   | 524          | 2.8             |
| Boyacá-Cundinamarca             | 605          | 164                   | 441          | 3.3             |
| Eje Cafetero                    | 360          | 101                   | 259          | 4.2             |
| Meta-Arauca-Casanare            | 401          | 124                   | 277          | 4.0             |
| Pacífica                        | 601          | 182                   | 419          | 3.3             |
| Santanderes                     | 500          | 146                   | 354          | 3.6             |
| Tolima-Huila-Caquetá            | 500          | 155                   | 345          | 3.6             |
| <b>Total</b>                    | <b>4.802</b> | <b>1.458</b>          | <b>3.344</b> | <b>1.2</b>      |
